# Supplementary material for: Prevalence of vaginal microorganisms among pregnant women according to trimester and association with preterm birth
Source: PubMed Central journal article supplement — Obstet Gynecol Sci. 2017 Dec 26;61(1):38–47. doi: 10.5468/ogs.2018.61.1.38 (PMC5780319; doi:10.5468/ogs.2018.61.1.38), 2017-12-26
Supplement: ogs-61-38-s001.pdf [file ogs-61-38-s001.pdf]

**Supplementary Table 1.** Delivery outcomes according to antibiotics treatment in bacterial colonization group in each trimester

| Delivery outcomes                   | 1st trimester                   |                              |         | 2nd trimester                   |                              |         | 3rd trimester                  |                              |         |
|-------------------------------------|---------------------------------|------------------------------|---------|---------------------------------|------------------------------|---------|--------------------------------|------------------------------|---------|
|                                     | No antibiotics treatment (n=35) | Antibiotics treatment (n=14) | P-value | No antibiotics treatment (n=11) | Antibiotics treatment (n=18) | P-value | No antibiotics treatment (n=7) | Antibiotics treatment (n=27) | P-value |
| Gestational age at examination (wk) | 8.2 (5.0–13.5)                  | 8.1 (5.0–13.0)               | 0.908   | 18.6 (14.6–25.1)                | 20.6 (15.2–27.1)             | 0.155   | 34.0 (30.4–38.2)               | 33.1 (28.0–38.2)             | 0.494   |
| Gestational age at delivery (wk)    | 37.6 (63.5–41.0)                | 38.0 (18.1–41.4)             | 0.951   | 35.4 (21.3–40.6)                | 36.2 (19.2–41.4)             | 0.773   | 39.3 (37.4–40.3)               | 39.2 (37.0–42.0)             | 0.621   |
| Early miscarriage                   | 1 (2.9)                         | 0 (0.0)                      | 0.714   | -                               | -                            | -       | -                              | -                            | -       |
| Late miscarriage                    | 0 (0.0)                         | 1 (7.1)                      | 0.286   | 1 (9.1)                         | 1 (5.6)                      | 0.623   | -                              | -                            | -       |
| Preterm delivery (wk)               |                                 |                              |         |                                 |                              |         |                                |                              |         |
| <28.0                               | 0 (0.0)                         | 0 (0.0)                      | -       | 1 (9.1)                         | 1 (5.6)                      | 0.623   | -                              | -                            | -       |
| 28.0–33.6                           | 1 (2.9)                         | 0 (0.0)                      | 0.714   | 1 (9.1)                         | 2 (11.1)                     | 0.684   | 0 (0.0)                        | 0 (0.0)                      | -       |
| 34.0–37.0                           | 1 (2.9)                         | 0 (0.0)                      | 0.714   | 1 (9.1)                         | 1 (5.6)                      | 0.623   | 0 (0.0)                        | 0 (0.0)                      | -       |
| Full term delivery                  | 32 (91.4)                       | 13 (92.9)                    | 0.680   | 7 (63.6)                        | 13 (72.2)                    | 0.466   | 7 (100.0)                      | 27 (100.0)                   | -       |
| Abortus                             | 1 (2.9)                         | 0 (0.0)                      | 0.714   | 0 (0.0)                         | 1 (5.6)                      | 0.621   | -                              | -                            | -       |
| Stillbirth                          | 0 (0.0)                         | 0 (0.0)                      | -       | 1 (9.1)                         | 0 (0.0)                      | 0.379   | 0 (0.0)                        | 0 (0.0)                      | -       |
| Live birth                          | 33 (94.3)                       | 14 (100.0)                   | 0.506   | 10 (90.9)                       | 17 (94.4)                    | 0.623   | 7 (100.0)                      | 27 (100.0)                   | -       |
| Sex (male)                          | 15 (42.9)                       | 10 (71.4)                    | 0.182   | 3 (27.3)                        | 11 (61.1)                    | 0.109   | 2 (28.6)                       | 12 (41.2)                    | 0.378   |
| Birth weight (kg)                   | 3.37 (1.14–4.27)                | 3.21 (0.23–3.21)             | 0.561   | 2.75 (0.27–3.79)                | 2.89 (0.85–4.24)             | 0.741   | 3.04 (2.22–3.70)               | 3.20 (2.36–4.34)             | 0.453   |
| Apgar score at 1 min (<4)           | 0 (0.0)                         | 1 (7.7)                      | 0.271   | 2 (18.2)                        | 0 (0.0)                      | 0.146   | 0 (0.0)                        | 0 (0.0)                      | -       |
| Apgar score at 5 min (<7)           | 0 (0.0)                         | 0 (0.0)                      | -       | 2 (18.2)                        | 0 (0.0)                      | 0.146   | 0 (0.0)                        | 0 (0.0)                      | -       |
| NICU admission                      | 2 (5.9)                         | 0 (0.0)                      | 0.519   | 0 (0.0)                         | 3 (17.6)                     | 0.232   | 0 (0.0)                        | 1 (3.7)                      | 0.794   |
| Neonatal sepsis                     | 1 (2.9)                         | 0 (0.0)                      | 0.723   | 0 (0.0)                         | 1 (5.9)                      | 0.630   | 0 (0.0)                        | 1 (3.7)                      | 0.794   |

Values are presented as number (range) or median (%).  
NICU, neonatal intensive care unit.
